# Supplementary material
Source: PubMed Central journal article supplement (PMC166272)

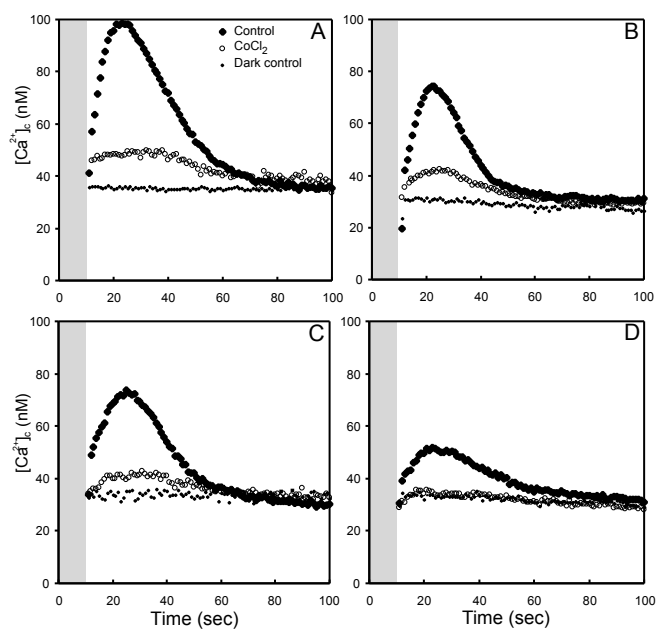

Supplement: pnas_100_14_8583__2.pdf [file pnas_100_14_8583__2.pdf]

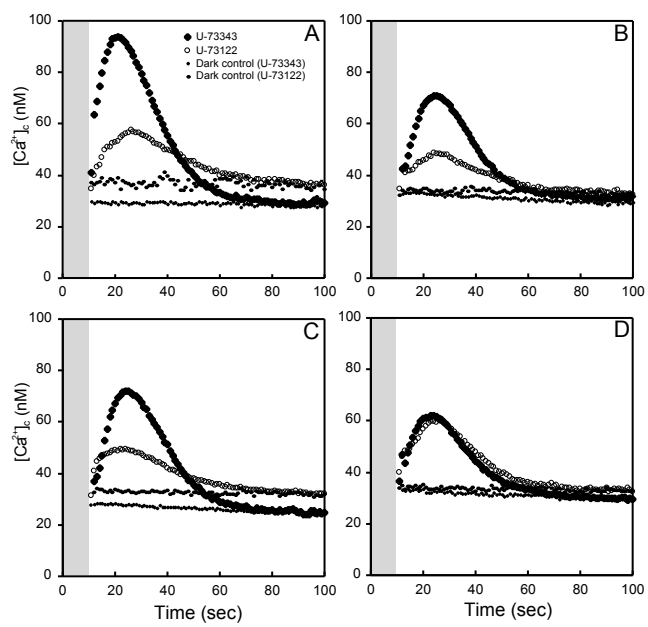

Supplement: pnas_100_14_8583__4.pdf [file pnas_100_14_8583__4.pdf]
